# Supplementary material
Source: Springer Nature journal article supplement (https://www.springermedizin.de/resource/supplementary/12936_2011_1761_MOESM2_ESM.pdf/9541664)

306 patients sent for malaria microscopy (N=7 clinics)

Clinic slide result:  
*P. vivax* +ve: N = 280

Clinic slide result:  
Malaria -ve: N = 26

PCR + Reference microscopy

Consensus gold standard:

Malaria -ve: N = 21

Malaria +ve: N = 285

*P. vivax*: N = 284

*P. malariae*: N = 1

*P. ovale*: N = 0

*P. falciparum*: N = 0

vs.

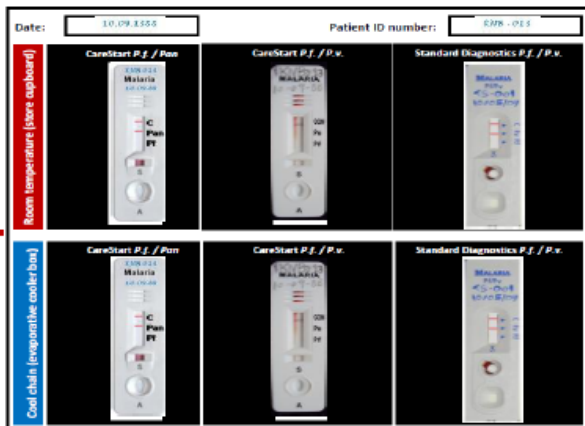

Supplement: MOESM2 [file 9541664]
